# Supplementary material for: Overcoming the barriers to diagnosis of Morquio A syndrome
Source: Springer Nature journal article supplement (doi:10.1186/s13023-014-0192-7), 2014-11-29
Supplement: MOESM18 [file 9775958]

## Information from medical charts

| <b>Age at symptom onset mean (median; min, max) months</b>      |                          |
|-----------------------------------------------------------------|--------------------------|
| All n = 18                                                      | 77.1 (42.0 ; 0, 540)     |
| Without outlier n = 16                                          | 53.0 (42.0; 3.0, 192.0)  |
| <b>Age at first consultation mean (median; min, max) months</b> |                          |
| All n = 18                                                      | 78.9 (42.0; 4.5, 540.0)  |
| Without outlier n = 16                                          | 54.8 (42.0; 12.0, 192.0) |
| <b>Age at diagnosis mean (median; min, max) months</b>          |                          |
| All n = 18                                                      | 113.8 (60.0; 7.0, 540.0) |
| Without outlier n = 16                                          | 93.9 (60.0; 14.0, 324.0) |
| <b>Diagnoses identified for study inclusion</b>                 | <b>N (%)</b>             |
| Australia                                                       | 7 (39%)                  |
| South Korea                                                     | 4 (22%)                  |
| Taiwan                                                          | 3 (17%)                  |
| Japan                                                           | 2 (11%)                  |
| Thailand                                                        | 1 (6%)                   |
| Hong Kong                                                       | 1 (6%)                   |
| <b>Gender</b>                                                   | <b>N (%)</b>             |
| Female                                                          | 14 (78%)                 |
| Male                                                            | 4 (22%)                  |
| <b>Pre-diagnostic key symptoms and findings</b>                 | <b>N (%)</b>             |
| Short stature                                                   | 13 (72%)                 |
| Pectus carinatum                                                | 9 (50%)                  |
| Genu valgum                                                     | 8 (44%)                  |
| Spinal abnormalities                                            | 7 (39%)                  |
| Gibbus/kyphosis                                                 | 5 (28%)                  |
| Scoliosis                                                       | 3 (17%)                  |
| Atlantoaxial instability                                        | 3 (17%)                  |
| Hip dysplasia                                                   | 4 (22%)                  |
| Impacted joint range of motion                                  | 2 (11%)                  |
| Joint pain                                                      | 2 (11%)                  |
| Advanced bone age                                               | 2 (11%)                  |
| Dermal melanocytosis                                            | 2 (11%)                  |
| Spinal cord compression                                         | 2 (11%)                  |
| Overgrowth within one year of age (“big baby”)                  | 2 (11%)                  |

- Other skeletal abnormalities experienced by patients included arachnodactyly shortened distal phalanges, dysplastic and fragmented proximal femoral epiphysis, flattening of femoral heads, acetabular irregularities, joint space narrowing
- Other general symptoms experienced by patients included upper respiratory infections, hernia repair, unsettled behavior

| <b>Impediments to diagnosis</b>                                               | <b>N (%)</b> |
|-------------------------------------------------------------------------------|--------------|
| Atypical symptoms                                                             | 5 (28%)      |
| Subtle symptoms                                                               | 4 (22%)      |
| Symptoms associated with other diseases                                       | 4 (22%)      |
| Marginally elevated or normal uGAG levels                                     | 4 (22%)      |
| Delayed clinical suspicion                                                    | 2 (11%)      |
| Other radiologic differentials (pseudoachondroplasia)                         | 1 (6%)       |
| <b>Misdiagnosis and other clinical diagnoses prior to Morquio A diagnosis</b> | <b>N (%)</b> |
| Spondyloepiphyseal Dysplasias                                                 | 5 (28%)      |
| Gibbus/kyphosis                                                               | 5 (28%)      |
| Scoliosis                                                                     | 3 (17%)      |
| Craniosynostosis                                                              | 2 (11%)      |
| Advanced bone/dental age                                                      | 2 (11%)      |
| Overgrowth                                                                    | 2 (11%)      |
| Genu valgum                                                                   | 2 (11%)      |
| Corneal opacity                                                               | 2 (11%)      |
| Cardiac conduction abnormality                                                | 2 (11%)      |
| Legg-Calvé-Perthes Disease                                                    | 1 (6%)       |
| Leri-Weill syndrome                                                           | 1 (6%)       |
| Marfan syndrome                                                               | 1 (6%)       |
| Sotos syndrome                                                                | 1 (6%)       |
| Pseudoachondroplasia                                                          | 1 (6%)       |
| Truncal hypotonia                                                             | 1 (6%)       |
| Hypertelorism                                                                 | 1 (6%)       |
| Splenomegaly                                                                  | 1 (6%)       |
| Growth hormone deficiency                                                     | 1 (6%)       |
| Torticollis                                                                   | 1 (6%)       |
| Sleep obstruction (snoring)                                                   | 1 (6%)       |
| Cervical lymphadenopathy                                                      | 1 (6%)       |
| Apnea/hypopnoea                                                               | 1 (6%)       |
| Truncal hypotonia                                                             | 1 (6%)       |
| Rheumatoid arthritis                                                          | 1 (6%)       |
| Harrison sulcus                                                               | 1 (6%)       |
| Lumbar lordosis                                                               | 1 (6%)       |
| Reversed Madelung deformity                                                   | 1 (6%)       |
| Autism                                                                        | 1 (6%)       |
| <b>Specialist responsible for Morquio A diagnosis</b>                         | <b>N (%)</b> |
| Geneticist                                                                    | 10 (56%)     |
| Radiologist                                                                   | 5 (28%)      |
| Pediatrician                                                                  | 2 (11%)      |
| Endocrinologist                                                               | 1 (6%)       |
